# Supplementary material
Source: publisher figshare collection journal article supplement (https://acs.figshare.com/ndownloader/files/4519021)
Supplement: Supplementary file 1 [file 4519021]

data_k09192 

_audit_creation_method            SHELXL-97 
_chemical_name_systematic 
; 
? 
; 
_chemical_name_common             ? 
_chemical_melting_point           ? 
_chemical_formula_moiety          'C25 H32 N O4 S' 
_chemical_formula_sum 
'C25 H32 N O4 S' 
_chemical_formula_weight          442.58 
_chemical_absolute_configuration  'ad'

loop_ 
_atom_type_symbol 
_atom_type_description 
_atom_type_scat_dispersion_real 
_atom_type_scat_dispersion_imag 
_atom_type_scat_source 
'C'  'C'   0.0033   0.0016 
'International Tables Vol C Tables 4.2.6.8 and 6.1.1.4' 
'H'  'H'   0.0000   0.0000 
'International Tables Vol C Tables 4.2.6.8 and 6.1.1.4' 
'N'  'N'   0.0061   0.0033 
'International Tables Vol C Tables 4.2.6.8 and 6.1.1.4' 
'O'  'O'   0.0106   0.0060 
'International Tables Vol C Tables 4.2.6.8 and 6.1.1.4' 
'S'  'S'   0.1246   0.1234 
'International Tables Vol C Tables 4.2.6.8 and 6.1.1.4' 

_symmetry_cell_setting            Monoclinic 
_symmetry_space_group_name_H-M    'P 21' 
_symmetry_space_group_name_Hall    'P 2yb' 

loop_ 
_symmetry_equiv_pos_as_xyz 
'x, y, z' 
'-x, y+1/2, -z' 

_cell_length_a                    10.3654(5) 
_cell_length_b                    10.9898(5) 
_cell_length_c                    10.6563(5) 
_cell_angle_alpha                 90.00 
_cell_angle_beta                  104.714(2) 
_cell_angle_gamma                 90.00 
_cell_volume                      1174.09(10) 
_cell_formula_units_Z             2 
_cell_measurement_temperature     150(1) 
_cell_measurement_reflns_used     6591 
_cell_measurement_theta_min       2.7 
_cell_measurement_theta_max       27.5 

_exptl_crystal_description        'block' 
_exptl_crystal_colour             'colourless' 
_exptl_crystal_size_max           0.22 
_exptl_crystal_size_mid           0.16 
_exptl_crystal_size_min           0.12 
_exptl_crystal_density_meas       ? 
_exptl_crystal_density_diffrn     1.252 
_exptl_crystal_density_method     'not measured' 
_exptl_crystal_F_000              474 
_exptl_absorpt_coefficient_mu     0.168 
# Absorption correction 

_exptl_absorpt_correction_type 'multi-scan' 
_exptl_absorpt_correction_T_min  0.689
_exptl_absorpt_correction_T_max  0.958
_exptl_absorpt_process_details
;
multi-scan from symmetry-related measurements 
Sortav (Blessing 1995)
;


_exptl_special_details 
; 
? 
; 

_diffrn_ambient_temperature       150(1) 
_diffrn_radiation_wavelength      0.71073 
_diffrn_radiation_type            MoK\a 
_diffrn_radiation_source          'fine-focus sealed tube' 
_diffrn_radiation_monochromator   graphite 
_diffrn_measurement_device_type   'Nonius KappaCCD' 
_diffrn_measurement_method        '\f scans and \w scans with \k offsets' 
_diffrn_detector_area_resol_mean  9 
_diffrn_reflns_number             6591 
_diffrn_reflns_av_R_equivalents   0.0305 
_diffrn_reflns_av_sigmaI/netI     0.0732 
_diffrn_reflns_limit_h_min        -13 
_diffrn_reflns_limit_h_max        13 
_diffrn_reflns_limit_k_min        -14 
_diffrn_reflns_limit_k_max        12 
_diffrn_reflns_limit_l_min        -12 
_diffrn_reflns_limit_l_max        13 
_diffrn_reflns_theta_min          2.71 
_diffrn_reflns_theta_max          27.47 
_reflns_number_total              4512 
_reflns_number_gt                 3319 
_reflns_threshold_expression      'I>2\s(I)' 


_computing_data_collection        'Collect (Nonius B.V., 1997-2002)' 
_computing_cell_refinement        'Denzo-SMN (Otwinowski & Minor, 1997)' 
_computing_data_reduction         'Denzo-SMN' 
_computing_structure_solution     'SIR-92 (Altomare et al., 1994)' 
_computing_structure_refinement   'SHELXTL V6.1 (Sheldrick, 2008)' 
_computing_molecular_graphics     'PLATON (Spek, 2003)' 
_computing_publication_material   'SHELXTL V6.1'

_publ_section_references
;
Altomare, A., Cascarano, G., Giacovazzo, C., Guagliardi, A., 
Burla, M. C., Polidori, G. & Camalli, M. (1994). J. Appl. Cryst. 
27, 435.

Blessing, R. H. (1995). Acta Cryst. A51, 33-38.

Nonius B.V (1997-2002). Collect. Data collection software, Delft, 
The Netherlands. 

Otwinowski, Z. & Minor, W. (1997). Methods in Enzymology, Vol. 276,
Macromolecular Crystallography, Part A edited by C. W. Carter &
R. M. Sweet pp. 307-326. London: Academic press. 

Sheldrick, G. M. (2008). Acta Cryst. A64, 112-122.

Spek, A.L. (2003). J. Appl. Cryst. 36, 7-13.
;

_refine_special_details 
; 
Refinement of F^2^ against ALL reflections.  The weighted R-factor wR and 
goodness of fit S are based on F^2^, conventional R-factors R are based 
on F, with F set to zero for negative F^2^. The threshold expression of 
F^2^ > 2sigma(F^2^) is used only for calculating R-factors(gt) etc. and is 
not relevant to the choice of reflections for refinement.  R-factors based 
on F^2^ are statistically about twice as large as those based on F, and R- 
factors based on ALL data will be even larger. 
; 

_refine_ls_structure_factor_coef  Fsqd 
_refine_ls_matrix_type            full 
_refine_ls_weighting_scheme       calc 
_refine_ls_weighting_details 
'calc w=1/[\s^2^(Fo^2^)+(0.0501P)^2^+0.8735P] where P=(Fo^2^+2Fc^2^)/3' 
_atom_sites_solution_primary      direct 
_atom_sites_solution_secondary    difmap 
_atom_sites_solution_hydrogens    geom 
_refine_ls_hydrogen_treatment     constr
_refine_ls_extinction_method      none 
_refine_ls_extinction_coef        ? 
_refine_ls_abs_structure_details 
'Flack H D (1983), Acta Cryst. A39, 876-881' 
_refine_ls_abs_structure_Flack    -0.03(12) 
_refine_ls_number_reflns          4512 
_refine_ls_number_parameters      285 
_refine_ls_number_restraints      1 
_refine_ls_R_factor_all           0.0946 
_refine_ls_R_factor_gt            0.0599 
_refine_ls_wR_factor_ref          0.1453 
_refine_ls_wR_factor_gt           0.1248 
_refine_ls_goodness_of_fit_ref    1.055 
_refine_ls_restrained_S_all       1.055 
_refine_ls_shift/su_max           0.000 
_refine_ls_shift/su_mean          0.000 

loop_ 
_atom_site_label 
_atom_site_type_symbol 
_atom_site_fract_x 
_atom_site_fract_y 
_atom_site_fract_z 
_atom_site_U_iso_or_equiv 
_atom_site_adp_type 
_atom_site_occupancy 
_atom_site_symmetry_multiplicity 
_atom_site_calc_flag 
_atom_site_refinement_flags 
_atom_site_disorder_assembly 
_atom_site_disorder_group 
S1 S 0.46176(9) 0.13632(9) 0.52477(8) 0.0311(2) Uani 1 1 d . . . 
O1 O 0.5173(3) 0.4242(3) 0.7204(3) 0.0412(7) Uani 1 1 d . . . 
O2 O 0.5974(2) 0.1462(3) 0.5190(2) 0.0373(6) Uani 1 1 d . . . 
O3 O 0.4234(3) 0.0268(3) 0.5794(3) 0.0391(7) Uani 1 1 d . . . 
O4 O 0.7803(3) 0.1347(3) 0.9221(2) 0.0432(7) Uani 1 1 d . . . 
N1 N 0.4195(3) 0.2601(3) 0.6014(3) 0.0297(7) Uani 1 1 d . . . 
C1 C 0.5133(4) 0.3124(4) 0.7062(4) 0.0320(9) Uani 1 1 d . . . 
C2 C 0.5957(4) 0.2317(4) 0.8012(4) 0.0343(9) Uani 1 1 d . . . 
C3 C 0.5545(4) 0.1324(5) 0.8509(3) 0.0370(9) Uani 1 1 d . . . 
H3A H 0.5358 0.0664 0.7855 0.044 Uiso 1 1 calc R . . 
H3B H 0.4717 0.1498 0.8778 0.044 Uiso 1 1 calc R . . 
C4 C 0.6654(4) 0.0939(4) 0.9680(4) 0.0423(11) Uani 1 1 d . . . 
C5 C 0.6736(5) -0.0360(4) 1.0117(5) 0.0525(13) Uani 1 1 d . . . 
H5A H 0.7509 -0.0465 1.0860 0.079 Uiso 1 1 calc R . . 
H5B H 0.6832 -0.0888 0.9405 0.079 Uiso 1 1 calc R . . 
H5C H 0.5921 -0.0578 1.0371 0.079 Uiso 1 1 calc R . . 
C6 C 0.7364(4) 0.2588(4) 0.8894(4) 0.0379(10) Uani 1 1 d . . . 
C7 C 0.8327(4) 0.3355(5) 0.8375(4) 0.0496(12) Uani 1 1 d . . . 
H7A H 0.8017 0.4217 0.8369 0.060 Uiso 1 1 calc R . . 
C8 C 0.8360(5) 0.3053(5) 0.6996(5) 0.0562(13) Uani 1 1 d . . . 
H8A H 0.7476 0.3191 0.6412 0.084 Uiso 1 1 calc R . . 
H8B H 0.8612 0.2198 0.6948 0.084 Uiso 1 1 calc R . . 
H8C H 0.9015 0.3574 0.6737 0.084 Uiso 1 1 calc R . . 
C9 C 0.9727(5) 0.3303(7) 0.9305(5) 0.089(2) Uani 1 1 d . . . 
H9A H 0.9667 0.3473 1.0191 0.133 Uiso 1 1 calc R . . 
H9B H 1.0300 0.3911 0.9045 0.133 Uiso 1 1 calc R . . 
H9C H 1.0107 0.2491 0.9272 0.133 Uiso 1 1 calc R . . 
C10 C 0.7143(4) 0.2966(4) 1.0220(4) 0.0376(10) Uani 1 1 d . . . 
C11 C 0.7333(4) 0.4040(4) 1.0910(4) 0.0446(11) Uani 1 1 d . . . 
H11A H 0.7614 0.4761 1.0565 0.054 Uiso 1 1 calc R . . 
C12 C 0.7094(4) 0.4015(5) 1.2145(4) 0.0450(11) Uani 1 1 d . . . 
H12A H 0.7244 0.4730 1.2662 0.054 Uiso 1 1 calc R . . 
C13 C 0.6645(4) 0.2977(4) 1.2629(4) 0.0435(11) Uani 1 1 d . . . 
H13A H 0.6478 0.2994 1.3466 0.052 Uiso 1 1 calc R . . 
C14 C 0.6432(4) 0.1904(4) 1.1907(4) 0.0392(10) Uani 1 1 d . . . 
H14A H 0.6117 0.1189 1.2234 0.047 Uiso 1 1 calc R . . 
C15 C 0.6695(4) 0.1917(4) 1.0710(4) 0.0379(10) Uani 1 1 d . . . 
C16 C 0.3300(4) 0.3442(4) 0.5110(4) 0.0326(9) Uani 1 1 d . . . 
H16A H 0.3836 0.4095 0.4827 0.039 Uiso 1 1 calc R . . 
C17 C 0.2154(4) 0.4016(4) 0.5598(4) 0.0395(10) Uani 1 1 d . . . 
H17A H 0.2116 0.3674 0.6447 0.047 Uiso 1 1 calc R . . 
H17B H 0.2247 0.4912 0.5672 0.047 Uiso 1 1 calc R . . 
C18 C 0.0918(4) 0.3649(4) 0.4516(4) 0.0383(10) Uani 1 1 d . . . 
H18A H 0.0052 0.3763 0.4753 0.046 Uiso 1 1 calc R . . 
C19 C 0.1214(4) 0.2319(4) 0.4223(4) 0.0343(9) Uani 1 1 d . . . 
C20 C 0.2567(4) 0.2679(4) 0.3928(4) 0.0302(8) Uani 1 1 d . . . 
C21 C 0.0999(4) 0.4319(4) 0.3270(4) 0.0455(11) Uani 1 1 d . . . 
H21A H 0.1255 0.5182 0.3451 0.055 Uiso 1 1 calc R . . 
H21B H 0.0138 0.4282 0.2605 0.055 Uiso 1 1 calc R . . 
C22 C 0.2102(4) 0.3608(4) 0.2825(4) 0.0391(10) Uani 1 1 d . . . 
H22A H 0.1735 0.3197 0.1983 0.047 Uiso 1 1 calc R . . 
H22B H 0.2840 0.4151 0.2750 0.047 Uiso 1 1 calc R . . 
C23 C 0.3507(4) 0.1689(4) 0.3705(4) 0.0366(10) Uani 1 1 d . . . 
H23A H 0.4013 0.1972 0.3088 0.044 Uiso 1 1 calc R . . 
H23B H 0.2999 0.0951 0.3344 0.044 Uiso 1 1 calc R . . 
C24 C 0.0197(4) 0.1756(4) 0.3069(4) 0.0470(12) Uani 1 1 d . . . 
H24A H -0.0640 0.1605 0.3310 0.071 Uiso 1 1 calc R . . 
H24B H 0.0548 0.0987 0.2829 0.071 Uiso 1 1 calc R . . 
H24C H 0.0035 0.2318 0.2331 0.071 Uiso 1 1 calc R . . 
C25 C 0.1318(4) 0.1460(5) 0.5382(4) 0.0412(9) Uani 1 1 d . . . 
H25A H 0.1978 0.1778 0.6138 0.062 Uiso 1 1 calc R . . 
H25B H 0.1594 0.0651 0.5164 0.062 Uiso 1 1 calc R . . 
H25C H 0.0448 0.1403 0.5581 0.062 Uiso 1 1 calc R . . 

loop_ 
_atom_site_aniso_label 
_atom_site_aniso_U_11 
_atom_site_aniso_U_22 
_atom_site_aniso_U_33 
_atom_site_aniso_U_23 
_atom_site_aniso_U_13 
_atom_site_aniso_U_12 
S1 0.0331(5) 0.0321(5) 0.0278(4) -0.0013(5) 0.0069(3) 0.0011(5) 
O1 0.0450(17) 0.0364(18) 0.0378(16) -0.0034(14) 0.0026(13) -0.0043(14) 
O2 0.0297(13) 0.0450(17) 0.0371(13) -0.0040(16) 0.0082(11) 0.0042(14) 
O3 0.0497(18) 0.0304(16) 0.0383(16) 0.0001(14) 0.0136(14) 0.0000(13) 
O4 0.0405(15) 0.0550(18) 0.0361(14) 0.0063(17) 0.0134(11) 0.0155(17) 
N1 0.0333(17) 0.0289(18) 0.0268(17) -0.0007(15) 0.0075(14) -0.0001(14) 
C1 0.029(2) 0.037(2) 0.031(2) -0.0055(19) 0.0086(16) -0.0023(17) 
C2 0.031(2) 0.041(3) 0.030(2) -0.0057(19) 0.0057(16) -0.0047(18) 
C3 0.043(2) 0.040(2) 0.0290(18) -0.007(2) 0.0096(16) 0.002(2) 
C4 0.042(2) 0.051(3) 0.035(2) 0.001(2) 0.0121(19) 0.007(2) 
C5 0.075(4) 0.046(3) 0.040(3) 0.007(2) 0.020(2) 0.020(3) 
C6 0.035(2) 0.050(3) 0.027(2) 0.002(2) 0.0049(17) 0.003(2) 
C7 0.035(2) 0.075(4) 0.036(2) 0.005(2) 0.0040(18) -0.010(2) 
C8 0.063(3) 0.062(3) 0.051(3) 0.001(3) 0.027(2) -0.007(3) 
C9 0.039(3) 0.165(7) 0.059(3) 0.021(4) 0.008(2) -0.020(4) 
C10 0.032(2) 0.050(3) 0.028(2) 0.003(2) 0.0041(17) -0.0020(19) 
C11 0.044(3) 0.047(3) 0.035(2) -0.001(2) -0.0028(19) -0.007(2) 
C12 0.042(2) 0.056(3) 0.033(2) -0.007(2) 0.0006(19) 0.001(2) 
C13 0.043(3) 0.053(3) 0.034(2) 0.001(2) 0.0103(19) 0.005(2) 
C14 0.038(2) 0.048(3) 0.030(2) 0.004(2) 0.0058(17) 0.0047(19) 
C15 0.031(2) 0.050(3) 0.031(2) 0.002(2) 0.0042(16) 0.0073(18) 
C16 0.032(2) 0.036(2) 0.029(2) 0.0045(18) 0.0050(16) 0.0008(18) 
C17 0.040(2) 0.040(3) 0.038(2) 0.000(2) 0.0081(19) 0.0081(18) 
C18 0.031(2) 0.039(3) 0.046(2) 0.007(2) 0.0118(18) 0.0060(18) 
C19 0.0289(19) 0.033(2) 0.040(2) 0.0034(19) 0.0076(17) 0.0001(17) 
C20 0.0288(19) 0.033(2) 0.0295(19) -0.0018(18) 0.0085(16) -0.0029(16) 
C21 0.045(3) 0.041(3) 0.045(2) 0.008(2) 0.000(2) 0.007(2) 
C22 0.044(2) 0.042(3) 0.030(2) 0.007(2) 0.0071(18) -0.003(2) 
C23 0.034(2) 0.044(3) 0.0295(19) -0.0016(18) 0.0039(16) 0.0041(17) 
C24 0.035(2) 0.042(3) 0.057(3) 0.002(2) -0.0014(19) -0.0068(18) 
C25 0.036(2) 0.042(2) 0.047(2) 0.009(2) 0.0145(17) -0.002(2) 

_geom_special_details 
; 
All esds (except the esd in the dihedral angle between two l.s. planes) 
are estimated using the full covariance matrix.  The cell esds are taken 
into account individually in the estimation of esds in distances, angles 
and torsion angles; correlations between esds in cell parameters are only 
used when they are defined by crystal symmetry.  An approximate (isotropic) 
treatment of cell esds is used for estimating esds involving l.s. planes. 
; 

loop_ 
_geom_bond_atom_site_label_1 
_geom_bond_atom_site_label_2 
_geom_bond_distance 
_geom_bond_site_symmetry_2 
_geom_bond_publ_flag 
S1 O2 1.427(2) . ? 
S1 O3 1.436(3) . ? 
S1 N1 1.700(3) . ? 
S1 C23 1.787(4) . ? 
O1 C1 1.237(5) . ? 
O4 C6 1.451(6) . ? 
O4 C4 1.467(5) . ? 
N1 C1 1.404(5) . ? 
N1 C16 1.480(5) . ? 
C1 C2 1.450(6) . ? 
C2 C3 1.330(6) . ? 
C2 C6 1.550(5) . ? 
C3 C4 1.526(5) . ? 
C4 C5 1.497(6) . ? 
C4 C15 1.529(6) . ? 
C6 C7 1.515(6) . ? 
C6 C10 1.544(6) . ? 
C7 C8 1.515(6) . ? 
C7 C9 1.537(6) . ? 
C10 C11 1.378(6) . ? 
C10 C15 1.393(6) . ? 
C11 C12 1.400(6) . ? 
C12 C13 1.381(7) . ? 
C13 C14 1.395(6) . ? 
C14 C15 1.371(6) . ? 
C16 C20 1.543(5) . ? 
C16 C17 1.547(5) . ? 
C17 C18 1.544(6) . ? 
C18 C21 1.540(6) . ? 
C18 C19 1.542(6) . ? 
C19 C24 1.532(6) . ? 
C19 C25 1.536(6) . ? 
C19 C20 1.563(5) . ? 
C20 C23 1.520(6) . ? 
C20 C22 1.539(6) . ? 
C21 C22 1.555(6) . ? 

loop_ 
_geom_angle_atom_site_label_1 
_geom_angle_atom_site_label_2 
_geom_angle_atom_site_label_3 
_geom_angle 
_geom_angle_site_symmetry_1 
_geom_angle_site_symmetry_3 
_geom_angle_publ_flag 
O2 S1 O3 117.26(18) . . ? 
O2 S1 N1 109.70(17) . . ? 
O3 S1 N1 110.12(15) . . ? 
O2 S1 C23 110.87(17) . . ? 
O3 S1 C23 111.16(19) . . ? 
N1 S1 C23 95.59(17) . . ? 
C6 O4 C4 97.8(3) . . ? 
C1 N1 C16 117.0(3) . . ? 
C1 N1 S1 119.9(3) . . ? 
C16 N1 S1 112.5(2) . . ? 
O1 C1 N1 120.0(4) . . ? 
O1 C1 C2 121.8(3) . . ? 
N1 C1 C2 118.1(4) . . ? 
C3 C2 C1 126.0(4) . . ? 
C3 C2 C6 105.3(3) . . ? 
C1 C2 C6 127.0(4) . . ? 
C2 C3 C4 107.5(4) . . ? 
O4 C4 C5 114.1(4) . . ? 
O4 C4 C3 98.6(3) . . ? 
C5 C4 C3 119.3(4) . . ? 
O4 C4 C15 98.5(3) . . ? 
C5 C4 C15 117.3(4) . . ? 
C3 C4 C15 105.7(4) . . ? 
O4 C6 C7 114.5(4) . . ? 
O4 C6 C10 98.2(3) . . ? 
C7 C6 C10 116.7(4) . . ? 
O4 C6 C2 98.9(3) . . ? 
C7 C6 C2 119.4(3) . . ? 
C10 C6 C2 105.7(3) . . ? 
C6 C7 C8 114.3(4) . . ? 
C6 C7 C9 110.2(4) . . ? 
C8 C7 C9 111.5(4) . . ? 
C11 C10 C15 121.6(4) . . ? 
C11 C10 C6 133.1(4) . . ? 
C15 C10 C6 105.2(4) . . ? 
C10 C11 C12 116.7(4) . . ? 
C13 C12 C11 121.7(5) . . ? 
C12 C13 C14 120.9(4) . . ? 
C15 C14 C13 117.6(4) . . ? 
C14 C15 C10 121.5(4) . . ? 
C14 C15 C4 133.2(4) . . ? 
C10 C15 C4 105.3(3) . . ? 
N1 C16 C20 106.8(3) . . ? 
N1 C16 C17 116.3(3) . . ? 
C20 C16 C17 103.6(3) . . ? 
C18 C17 C16 101.8(3) . . ? 
C21 C18 C19 102.8(3) . . ? 
C21 C18 C17 107.6(3) . . ? 
C19 C18 C17 103.2(3) . . ? 
C24 C19 C25 106.9(3) . . ? 
C24 C19 C18 114.4(3) . . ? 
C25 C19 C18 113.4(4) . . ? 
C24 C19 C20 114.2(3) . . ? 
C25 C19 C20 115.7(3) . . ? 
C18 C19 C20 92.1(3) . . ? 
C23 C20 C22 116.4(3) . . ? 
C23 C20 C16 108.3(3) . . ? 
C22 C20 C16 104.9(3) . . ? 
C23 C20 C19 119.6(3) . . ? 
C22 C20 C19 101.4(3) . . ? 
C16 C20 C19 104.7(3) . . ? 
C18 C21 C22 103.2(3) . . ? 
C20 C22 C21 102.3(3) . . ? 
C20 C23 S1 106.7(3) . . ? 

_diffrn_measured_fraction_theta_max    0.980 
_diffrn_reflns_theta_full              25.00 
_diffrn_measured_fraction_theta_full   0.991 
_refine_diff_density_max    0.267 
_refine_diff_density_min   -0.470 
_refine_diff_density_rms    0.059 
